# Supplementary material
Source: PubMed Central journal article supplement (PMC3461055)

**A**

Ra      Galactose      Glucose      Galactose  
      15 30 60 120 15 30 60 120 15 30

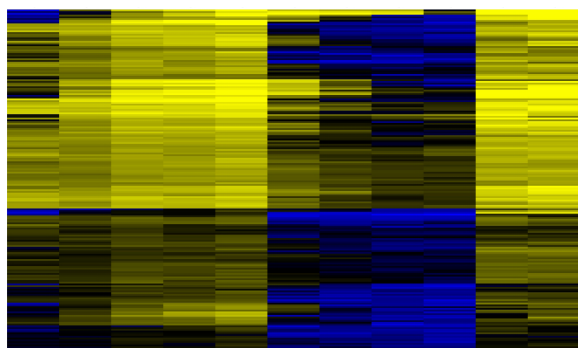

Galactose induced : 197 transcripts

**B**

Ra      Galactose      Glucose      Galactose  
      15 30 60 120 15 30 60 120 15 30

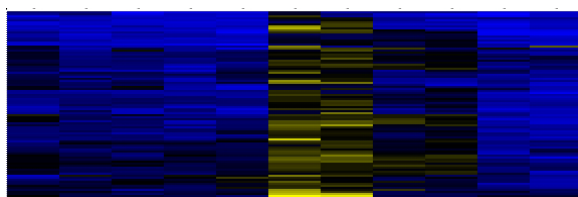

Glucose induced : 94 transcripts

**C**

Ra      Galactose      Glucose      Galactose  
      15 30 60 120 15 30 60 120 15 30

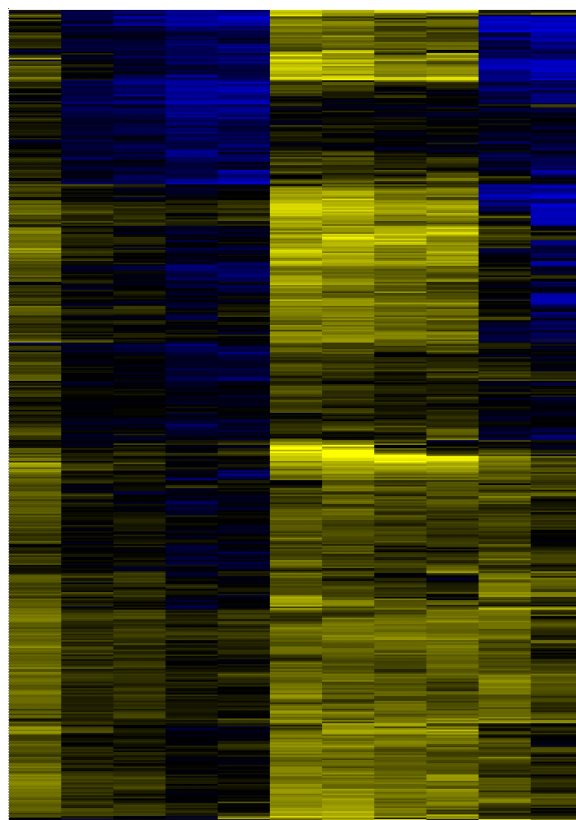

Galactose repressed : 509 transcripts

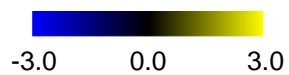

**A**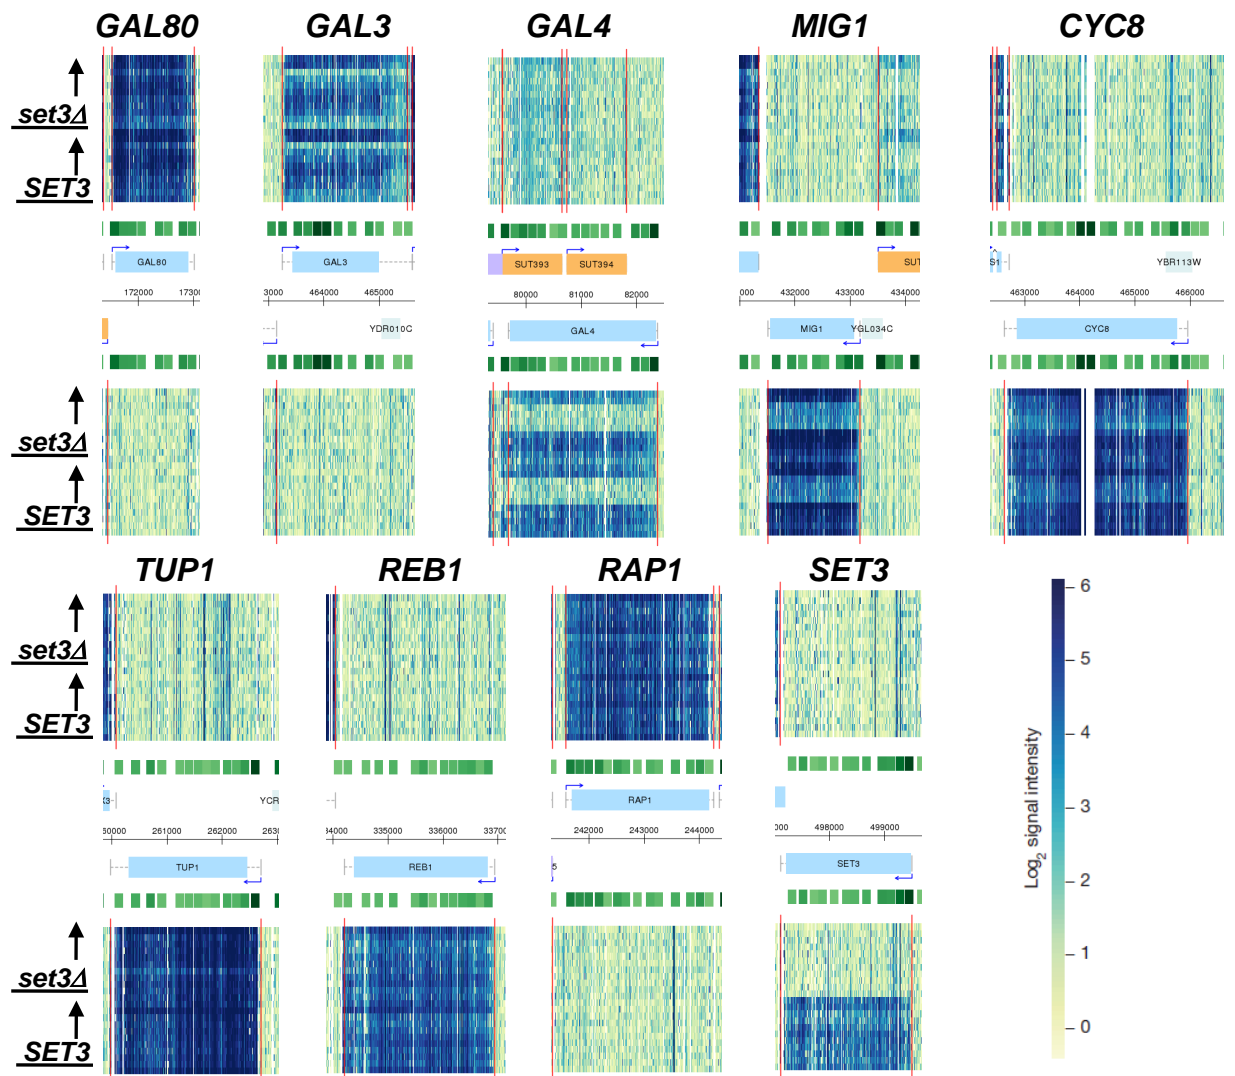**B**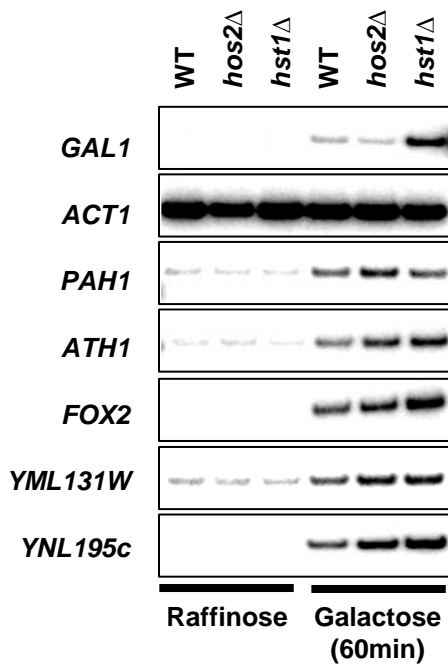**C**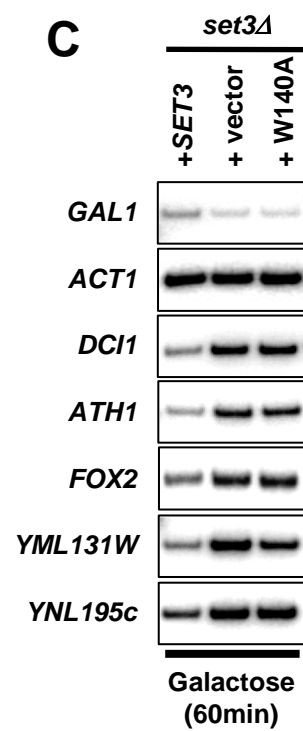

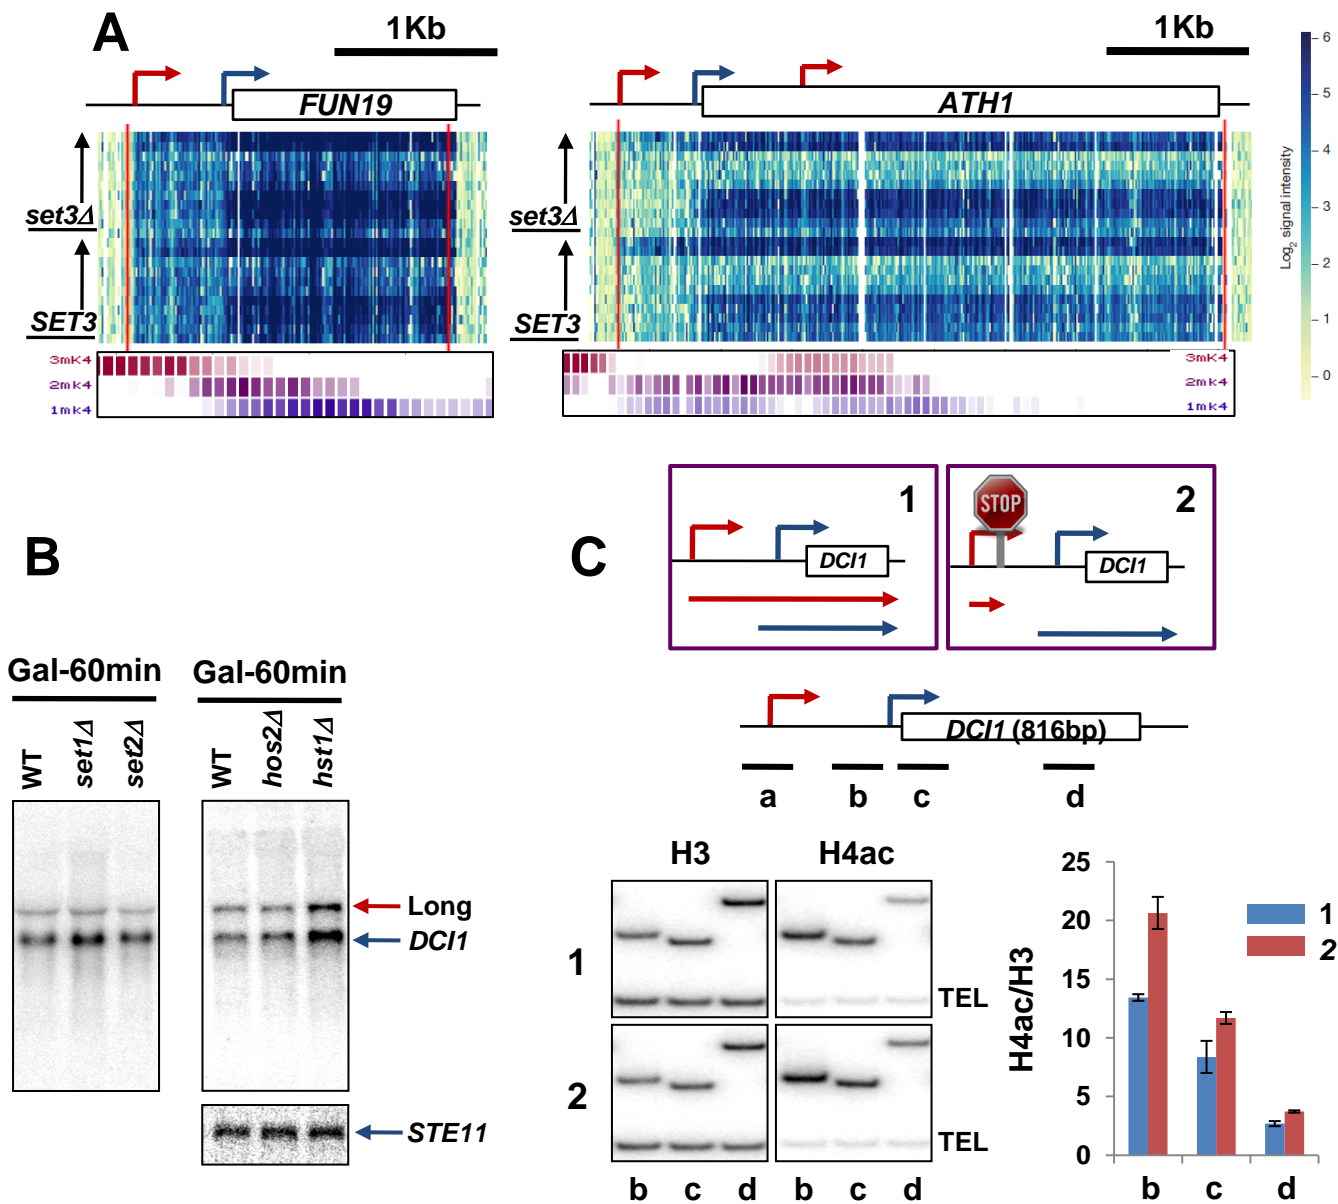

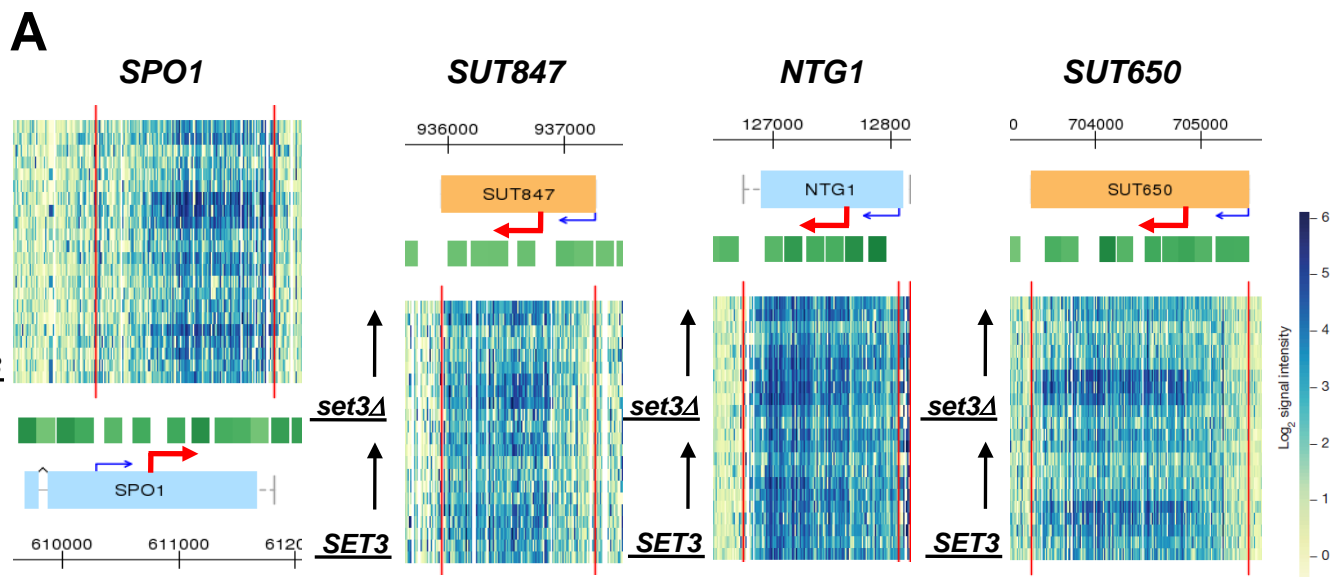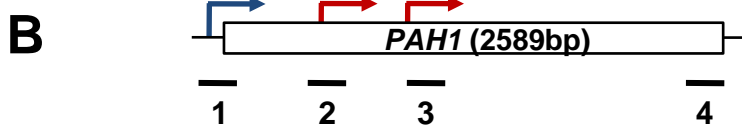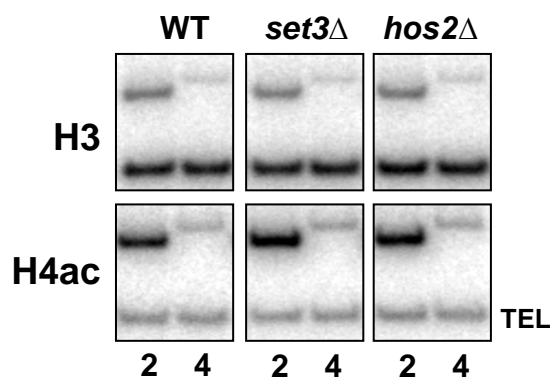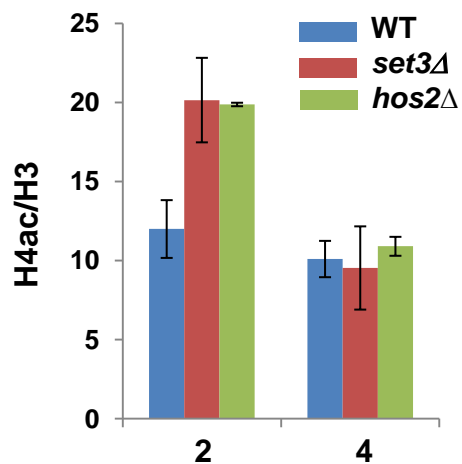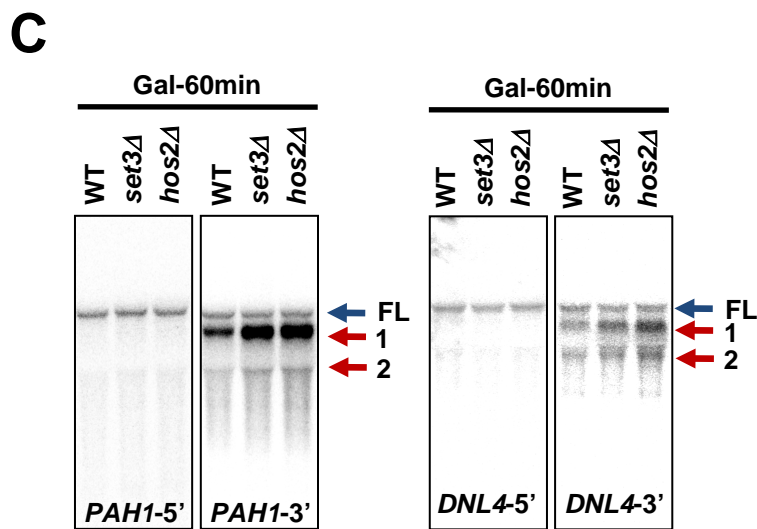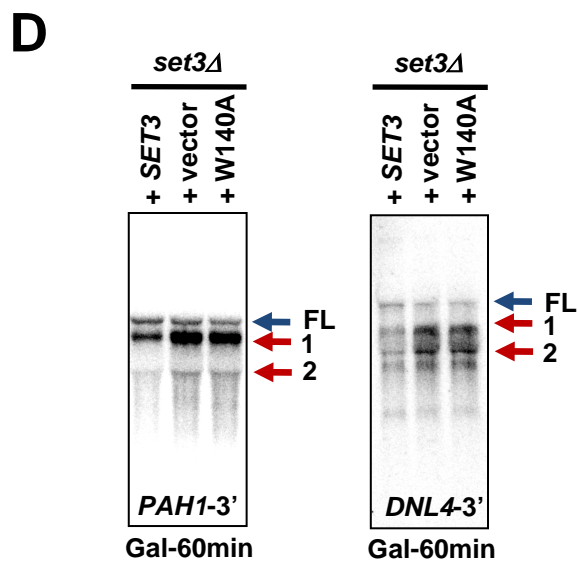

**A**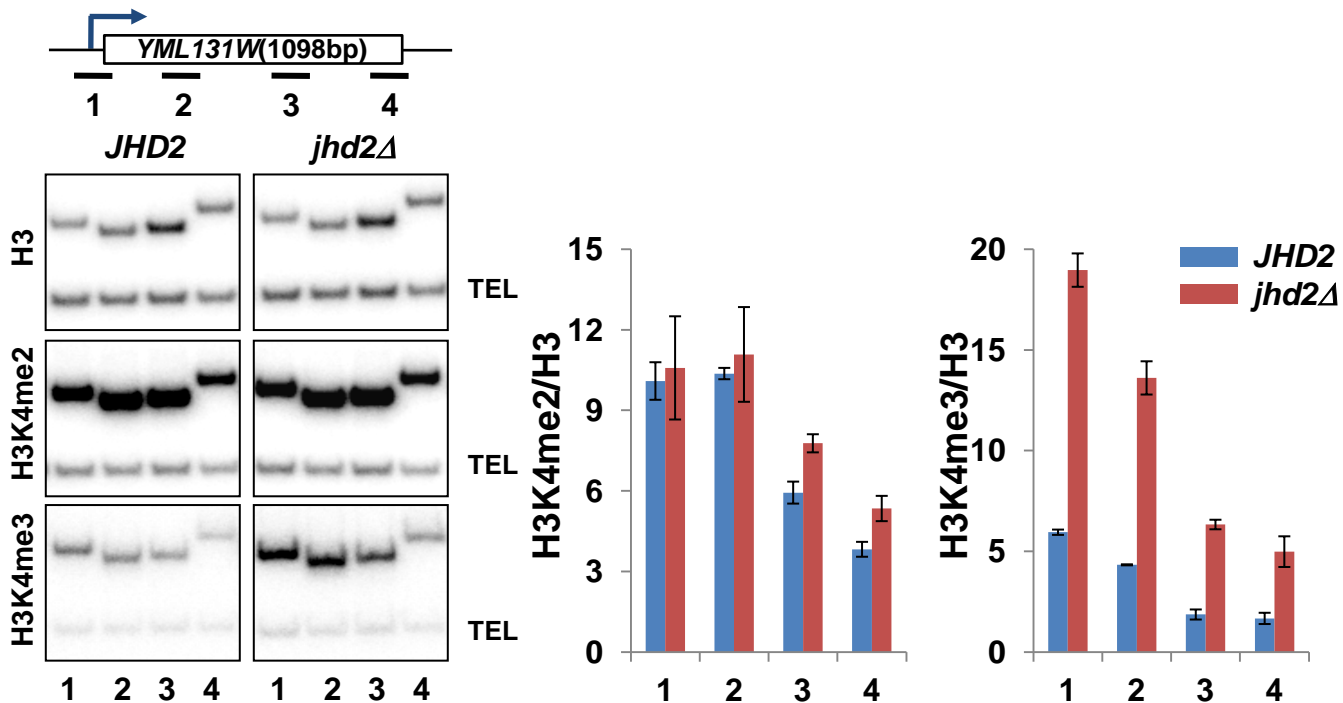**B**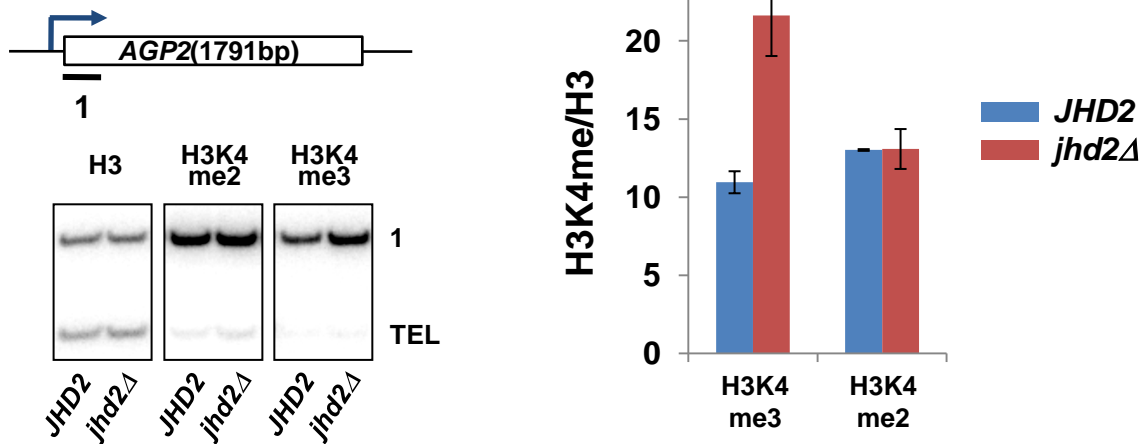**C**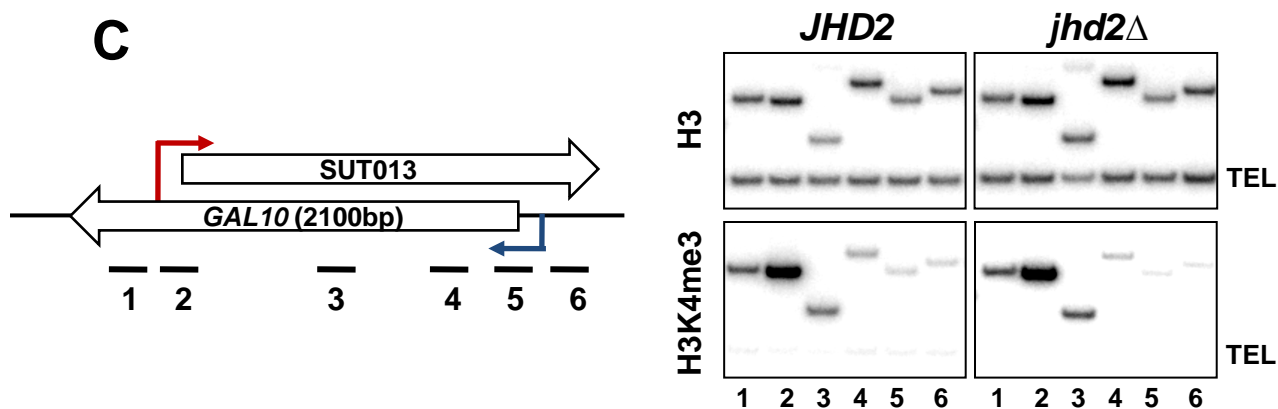

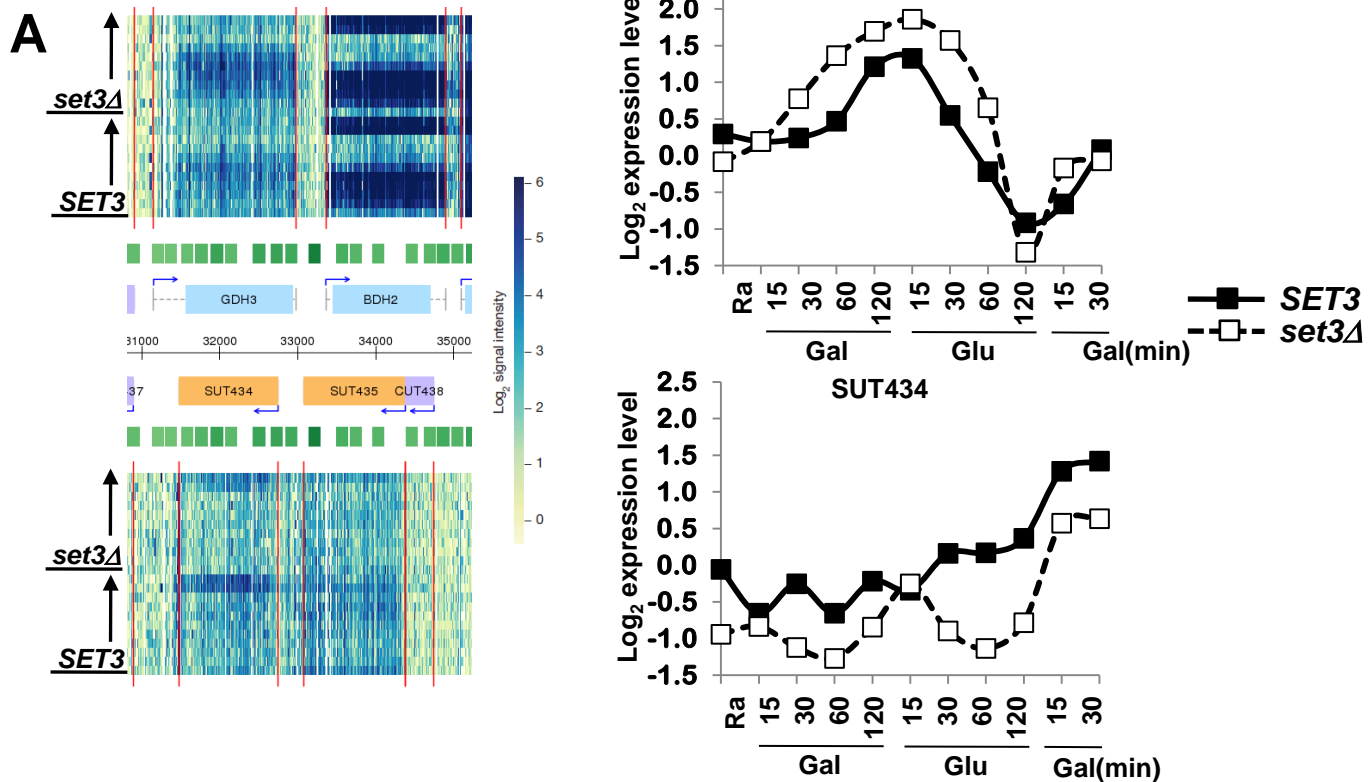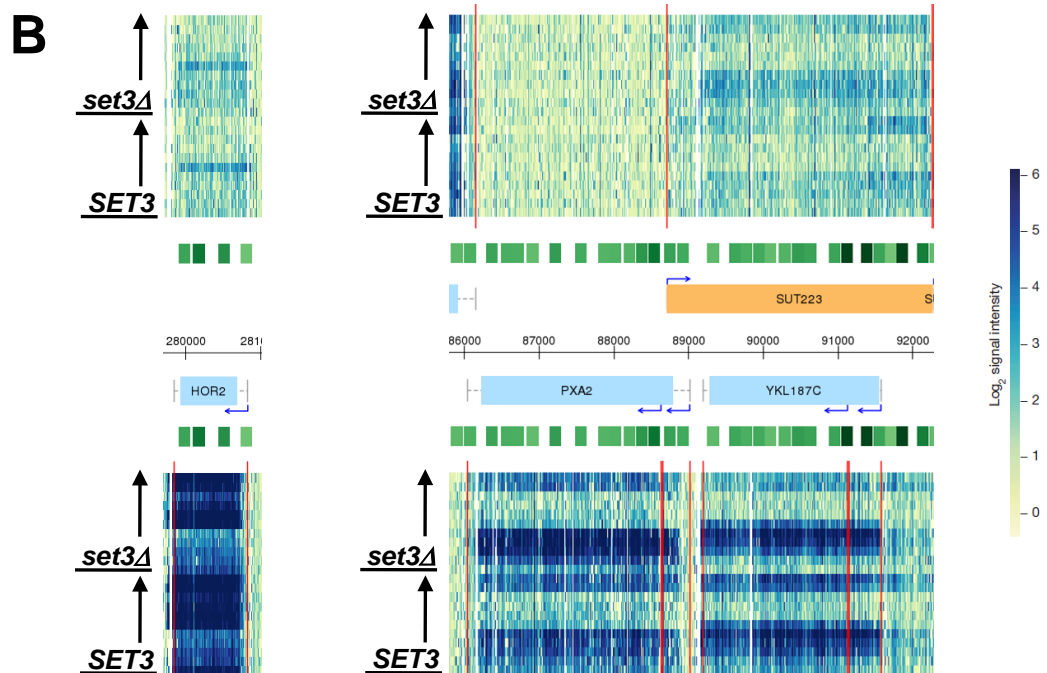

Supplement: NIHMS402235-supplement-02.pdf [file NIHMS402235-supplement-02.pdf]
